# Supplementary material
Source: PubMed Central journal article supplement (PMC10169446)

## SUPPLEMENTAL MATERIALS

### Supplemental Methods

*C. innocuum* isolation from stool. Clinical stool samples were saved by the clinical microbiology laboratory and stored at 4°C for up to 1 week prior to being aliquoted and stored at -80°C. To isolate *C. innocuum*, patient stool samples were thawed, and 200 mg aliquots were resuspended in 1 ml of saline. Sterile swabs were used to plate on pre-reduced cycloserine-cefoxitin-fructose agar with sodium taurocholate (TCCFA) with or without 1 µg/ml vancomycin to further select for *C. innocuum*. Plates were then incubated for 72 h at 37°C in an anaerobic chamber (5% hydrogen, 5% CO<sub>2</sub>, 90% N<sub>2</sub>). Stools that did not grow *C. innocuum* underwent ethanol shock for culture enrichment. An equal volume of 95% ethanol was added, and the mixture was incubated with shaking at 220 rpm at room temperature for 45 min. Samples were then centrifuged at 2,000xg for 15 min, and pellets were washed twice with saline and plated onto TCCFA and incubated as described above. Individual colonies were then selected and re-streaked onto Blood Agar Plates (TSA w/5% sheep blood). Single colonies were then picked and grown in Tryptic Soy Broth (TSB) (Millipore Sigma, Burlington, MA) as described below. *C. innocuum* was identified by matrix-assisted laser desorption/ionization- time of flight (MALDI-TOF) using the Bruker biotyper (Bruker, Billerica, MA). Further confirmation was identified by whole genome sequencing (see below).

Bacterial isolates and culture conditions. All bacterial isolates and plasmids used are listed in **Table S3**. In an anaerobic chamber, *C. innocuum* isolates were first cultured on blood agar plates and incubated for 24 h at 37°C. Single colonies were re-cultured for 24-48 h when indicated. For cloning, TOPO<sup>®</sup>10 *Escherichi coli* (Life Technologies Invitrogen, Carlsbad, CA) was grown at 37°C shaking in Luria-Bertani (LB) broth with 50–100 µg/ml ampicillin, when needed for plasmid maintenance.

Strain construction. *C. innocuum* (CI) amplicon was generated by identifying the core genome from 5 publicly available whole genome sequences (NCBI accessions CP022722.1, CZBW01, AGYV01, JQIF01, and FOTN01) using Spine [1]. Primer3 v2.5.0 was used to generate primer sets from the consensus core genome. Primer sets were screened using *in silico* PCR ([https://github.com/egonozer/in\\_silico\\_pcr](https://github.com/egonozer/in_silico_pcr)) against all available reference and draft genome sequences and one set was selected that was found in each genome with no mismatches or indels.

The primer set was found to amplify an intergenic region upstream of the tRNA-Ser gene with locus ID G4D54\_RS11630. NCBI Primer Blast was used to screen the primer set for amplification against the RefSeq representative genomes database filtered for all bacteria (taxid 2) and *Homo sapiens* (taxid 9606) with only *C. innocuum* species producing an amplicon. To further confirm our primer set was specific to *C. innocuum*, we performed *in silico* PCR against 60,664 draft genome assemblies produced from metagenomic sequencing of human gut samples from multiple experiments [2]. Our amplicon primers amplified unique nucleotide sequences only found in *C. innocuum*. The CI amplicon sequence was generated using the primers indicated in **Table S4**, and was cloned into pCR™II-TOPO® TA. PCR and sequencing confirmed the identity of vector inserts. Plasmids were introduced into TOPO®10 *E. coli* using Rapid One Shot® TOPO® TA Cloning® (Life Technologies Invitrogen, Carlsbad, CA) chemical transformation protocol. The plasmid containing CI amplicon was used as a positive control for qPCR experiments.

*C. innocuum* Quantitative PCR: Genomic DNA (gDNA) was extracted from stool samples (100 mg) using QIAamp PowerFecal Pro DNA Kit (Qiagen, Hilden, Germany) following the manufacturer's protocol. Quantitative PCR (qPCR) for *C. innocuum* was performed using PowerUp™ SYBR™ Green Master Mix (Applied Biosystems™, Waltham, MA) and qPCR amplicon primers listed in **Table S4**. qPCR samples were then run on a QuantStudio 6 Flex using QuantStudio Real-Time PCR Software v1.7.1 for analysis (Applied Biosystems™, Waltham, MA).

*C. difficile tcdB* PCR: *C. difficile tcdB* endpoint PCR was performed on either gDNA extracted from stool samples using QIAamp PowerFecal Pro DNA Kit or from a 2 ml bacterial culture overnight using the QIAamp BiOstic Bacteremia DNA Kit (Qiagen, Hilden, Germany) following the manufacturer's instructions. Primers used to amplify *tcdB* are indicated in **Table S4**. Cycling Conditions: 95°C 5 min; 40 cycles of: (95°C for 1 min, 55°C for 1 min, 72°C for 1 min); 72°C 10 min; Hold at 4°C.

### *Whole genome sequencing and analyses*

Genomic DNA extraction: The gDNA was extracted from single colonies cultured overnight using appropriate growth conditions as described above and the QIAamp BiOstic Bacteremia DNA Kit (Qiagen, Hilden, Germany) following the manufacturer's protocol.

Library preparation and whole genome sequencing (WGS): Libraries for Illumina sequencing were prepared using Nextera XT library kits (Illumina, Inc., San Diego, CA) or plexWell library kits (seqWell, Beverly, MA) and sequenced on the Illumina MiSeq platform to generate paired-end 300 bp reads. Reads were quality trimmed and adapters removed using Trimmomatic (v0.36) [3], and *de novo* assembly was performed using SPAdes version 3.9.1 [4]. Assembly sequences were annotated with prokka v1.14.6 [5] using the *C. innocuum* strain ATCC 14501 (NCBI accession NZ\_CP048838) as reference. WGS data, analyses, and genome accession numbers are contained in **Table S5**.

Phylogenomic and comparative genomics analyses: Core genome phylogenomic relationships between sequenced *C. innocuum* isolates were determined from whole genome assemblies using kSNP v3.01 [6]. Two additional *C. innocuum* strains were included in the analyses, the ATCC reference strain 14501 [7, 8] and LC-LUMC-CI-001 (LC-CI), a strain isolated from the stool of an adult thought to have *C. innocuum*-associated diarrhea [9]. Cladogram figures were generated using EvoView [10, 11].

To identify accessory genomic elements, the core genome of the 119 assembled genome sequences was determined using Spine v0.3.2 and accessory genome sequences of each isolate were determined using AGEnt v0.3.1 [1] ClustAGE v0.8.1 [12] as used to identify unique accessory genomic elements (AGEs) and determine their distributions among the set of assembled sequences. Cramer's V statistic for association with isolates from individuals with diarrheal illness was calculated for each accessory element in R using the *rcompanion* package v2.4.1 [13].

## Supplemental Results

### ***Prevalence of C. innocuum: Adult and Pediatric Subgroup Analyses***

Overall, *C. innocuum* was isolated by culture from stool from 126/300 (42%) subjects. Among these, *C. innocuum* was isolated by culture from the stool of 71/150 (47%) adults and 55/150 (36%) children ( $p=0.06$ ). Children had a lower median (IQR) ct values than the adult group (24.34 [19.85-27.31] vs. 25.33 [21.58-28.29];  $p=0.03$ ).

Among adults, *C. innocuum* was isolated by culture more frequently among asymptomatic controls: 30/50 (60%) from subjects with AAD and 41/100 (41%) from asymptomatic controls ( $p=0.03$ ; **Figure S1A**). However, qPCR ct values between asymptomatic and diarrheal symptomatic adults were not significantly different, with median (IQR) ct values of 24.9 (22.5-26.1) vs. 25.6 (21.4-28.7), respectively ( $p=0.42$ ; **Figure S1C**). From subjects with AAD who were colonized with *C. difficile*, *C. innocuum* was isolated more frequently and had lower median (IQR) ct values (56% and 24.9 [21.2-27.6]) than those who were not colonized with *C. difficile* (26% [ $p=0.04$ ]; and 27.9 [23-29.5],  $p=0.002$ ; **Figure S1B and Figure S1D**).

Among children with or without AAD, *C. innocuum* was isolated by culture at a similar frequency: 20/50 (40%) subjects with AAD and 35/100 (35%) asymptomatic controls ( $p=0.06$ ; **Figure S2A**). Asymptomatic controls had lower median (IQR) ct values than the diarrheal group (23.2 [18.9-26.8] vs. 25.2 [21.3-28.0],  $p=0.02$ ; **Figure S2C**). From subjects with AAD who were colonized with *C. difficile*, *C. innocuum* was isolated at a similar frequency and had similar stool qPCR ct values (42% and 24.3 [19.9-28.1]) than those who were not colonized with *C. difficile* (28% [ $p=0.15$ ]; and 25.7 [23.1-27.5],  $p>0.9999$ ; **Figure S2B and Figure S2D**).

## Supplemental References

1. Ozer EA, Allen JP, Hauser AR. Characterization of the core and accessory genomes of *Pseudomonas aeruginosa* using bioinformatic tools Spine and AGEnt. *BMC Genomics* **2014**; 15(1): 737.
2. Nayfach S, Shi ZJ, Seshadri R, Pollard KS, Kyrpides NC. New insights from uncultivated genomes of the global human gut microbiome. *Nature* **2019**; 568(7753): 505-10.
3. Bolger AM, Lohse M, Usadel B. Trimmomatic: a flexible trimmer for Illumina sequence data. *Bioinformatics* **2014**; 30(15): 2114-20.
4. Pribelski A, Antipov D, Meleshko D, Lapidus A, Korobeynikov A. Using SPAdes De Novo Assembler. *Current Protocols in Bioinformatics* **2020**; 70(1): e102.
5. Seemann T. Prokka: rapid prokaryotic genome annotation. *Bioinformatics* **2014**; 30(14): 2068-9.
6. Gardner SN, Slezak T, Hall BG. kSNP3. 0: SNP detection and phylogenetic analysis of genomes without genome alignment or reference genome. *Bioinformatics* **2015**; 31(17): 2877-8.
7. Smith LD, King E. *Clostridium innocuum*, sp. n., a sporeforming anaerobe isolated from human infections. *J Bacteriol* **1962**; 83: 938-9.
8. Cherny KE, Ozer EA, Kochan TJ, Kocielek LK. Complete Genome Sequence of *Clostridium innocuum* Strain ATCC 14501. *Microbiology Resource Announcements* **2020**; 9(30): e00452-20.
9. Cherny KE, Ozer EA, Kochan TJ, Johnson S, Kocielek LK, Rasko D. Complete Genome Sequence of *Clostridium innocuum* Strain LC-LUMC-CI-001, Isolated from a Patient with Recurrent Antibiotic-Associated Diarrhea. *Microbiology Resource Announcements* **2020**; 9(28): e00365-20.
10. He Z, Zhang H, Gao S, Lercher MJ, Chen WH, Hu S. Evolview v2: an online visualization and management tool for customized and annotated phylogenetic trees. *Nucleic Acids Res* **2016**; 44(W1): W236-41.
11. Zhang H, Gao S, Lercher MJ, Hu S, Chen WH. EvolView, an online tool for visualizing, annotating and managing phylogenetic trees. *Nucleic Acids Res* **2012**; 40(Web Server issue): W569-72.
12. Ozer EA. ClustAGE: a tool for clustering and distribution analysis of bacterial accessory genomic elements. *BMC bioinformatics* **2018**; 19(1): 150.
13. Mangiafico SS. Summary and analysis of extension program evaluation in R, version 1.18. 1. New Brunswick: Rutgers Cooperative Extension **2016**.

## Supplemental Tables

**Table S1: Demographic and clinical characteristics of included subjects in AAD and asymptomatic control pediatric and adult subgroups**

|                                           | Study Cohort<br>(n=300) | Pediatric:<br>AAD,<br>C. diff<br>colonized<br>(n=50) | Pediatric:<br>AAD,<br>C. diff non-<br>colonized<br>(n=50) | Pediatric:<br>Asymptomatic<br>controls<br>(n=50) | Adult:<br>AAD,<br>C. diff<br>colonized<br>(n=50) | Adult:<br>AAD, C. diff<br>non-<br>colonized<br>(n=50) | Adult:<br>Asymptomatic<br>controls<br>(n=50) |
|-------------------------------------------|-------------------------|------------------------------------------------------|-----------------------------------------------------------|--------------------------------------------------|--------------------------------------------------|-------------------------------------------------------|----------------------------------------------|
| <i>Age (y)</i>                            |                         |                                                      |                                                           |                                                  |                                                  |                                                       |                                              |
| Median (IQR)                              | 20 (9-59)               | 11 (6-16)                                            | 12 (6-15)                                                 | 6 (4-11)                                         | 58 (47-71)                                       | 60 (48-69)                                            | 20 (11-59)                                   |
| Age (y) range                             | 2-94                    | (2-18)                                               | (2-18)                                                    | (2-17)                                           | (24-94)                                          | (22-92)                                               | 2-94                                         |
| <i>Sex (male)</i>                         | 155 (51.7%)             | 36 (72%)                                             | 25 (50%)                                                  | 25 (50%)                                         | 18 (36%)                                         | 26 (52%)                                              | 25 (50%)                                     |
| <i>Race/Ethnicity</i>                     |                         |                                                      |                                                           |                                                  |                                                  |                                                       |                                              |
| Asian                                     | 11 (3.7%)               | 3 (6%)                                               | 1 (2%)                                                    | 4 (8%)                                           | 1 (2%)                                           | 1 (2%)                                                | 1 (2%)                                       |
| American Indian/Alaska<br>Native          | 0 (0%)                  | 0 (0%)                                               | 0 (0%)                                                    | 0 (0%)                                           | 0 (0%)                                           | 0 (0%)                                                | 0 (0%)                                       |
| Black                                     | 64 (21.3%)              | 6 (12%)                                              | 4 (8%)                                                    | 8 (16%)                                          | 14 (28%)                                         | 12 (24%)                                              | 20 (40%)                                     |
| Native Hawaiian/Other Pacific<br>Islander | 0 (0%)                  | 0 (0%)                                               | 0 (0%)                                                    | 0 (0%)                                           | 0 (0%)                                           | 0 (0%)                                                | 0 (0%)                                       |
| White                                     | 169 (56.3%)             | 25 (50%)                                             | 31 (62%)                                                  | 25 (50%)                                         | 31 (62%)                                         | 32 (64%)                                              | 25 (50%)                                     |
| Unknown                                   | 6 (2%)                  | 0 (0%)                                               | 0 (0%)                                                    | 1 (2%)                                           | 2 (4%)                                           | 3 (6%)                                                | 0 (0%)                                       |
| Other                                     | 50 (16.7%)              | 16 (32%)                                             | 14 (28%)                                                  | 12 (24%)                                         | 2 (4%)                                           | 2 (4%)                                                | 4 (8%)                                       |
| <i>Ethnicity</i>                          |                         |                                                      |                                                           |                                                  |                                                  |                                                       |                                              |
| Hispanic or Latino                        | 57 (19%)                | 16 (32%)                                             | 15 (30%)                                                  | 11 (22%)                                         | 6 (12%)                                          | 5 (10%)                                               | 4 (8%)                                       |
| Not Hispanic or Latino                    | 237 (79%)               | 34 (68%)                                             | 34 (68%)                                                  | 39 (78%)                                         | 42 (84%)                                         | 42 (84%)                                              | 46 (92%)                                     |
| Unknown                                   | 6 (2%)                  | 0 (0%)                                               | 1 (2%)                                                    | 0 (0%)                                           | 2 (4%)                                           | 3 (6%)                                                | 0 (0%)                                       |
| <i>Comorbidities</i>                      |                         |                                                      |                                                           |                                                  |                                                  |                                                       |                                              |
| Any comorbid condition                    | 273 (91%)               | 48 (96%)                                             | 45 (90%)                                                  | 45 (90%)                                         | 47 (94%)                                         | 46 (92%)                                              | 42 (84%)                                     |
| Malignancy/stem cell<br>transplant        | 95 (31.7%)              | 18 (36%)                                             | 19 (38%)                                                  | 16 (32%)                                         | 14 (28%)                                         | 23 (46%)                                              | 5 (10%)                                      |
| IBD                                       | 6 (2%)                  | 2 (4%)                                               | 3 (6%)                                                    | 0 (0%)                                           | 0 (0%)                                           | 1 (2%)                                                | 0 (0%)                                       |
| Non-IBD gastrointestinal<br>condition     | 34 (11.3%)              | 10 (20%)                                             | 9 (18%)                                                   | 2 (4%)                                           | 5 (10%)                                          | 6 (12%)                                               | 2 (4%)                                       |
| Solid organ transplant                    | 32 (10.7%)              | 5 (10%)                                              | 4 (8%)                                                    | 2 (4%)                                           | 10 (20%)                                         | 6 (12%)                                               | 5 (10%)                                      |
| Other immunocompromising<br>condition     | 21 (7%)                 | 5 (10%)                                              | 1 (2%)                                                    | 0 (0%)                                           | 9 (18%)                                          | 3 (6%)                                                | 3 (6%)                                       |
| Cardiovascular                            | 99 (33%)                | 6 (12%)                                              | 4 (8%)                                                    | 7 (14%)                                          | 25 (50%)                                         | 25 (50%)                                              | 32 (64%)                                     |

|                                       |             |           |           |          |           |           |          |
|---------------------------------------|-------------|-----------|-----------|----------|-----------|-----------|----------|
| Liver                                 | 7 (2.3%)    | 0 (0%)    | 1 (2%)    | 1 (2%)   | 3 (6%)    | 1 (2%)    | 1 (2%)   |
| Kidney                                | 32 (10.7%)  | 1 (2%)    | 4 (8%)    | 2 (4%)   | 9 (18%)   | 8 (16%)   | 8 (16%)  |
| Pulmonary                             | 20 (6.7%)   | 1 (2%)    | 2 (4%)    | 9 (18%)  | 0 (0%)    | 3 (6%)    | 5 (10%)  |
| Endocrine/Diabetes                    | 34 (11.3%)  | 1 (2%)    | 1 (2%)    | 0 (0%)   | 11 (22%)  | 8 (16%)   | 13 (26%) |
| <i>Antibiotic exposure (past 30d)</i> |             |           |           |          |           |           |          |
| Any systemic antibiotic               | 263 (87.7%) | 50 (100%) | 50 (100%) | 37 (74%) | 50 (100%) | 50 (100%) | 26 (52%) |
| Third/fourth generation cephalosporin | 103 (34.3%) | 19 (38%)  | 23 (46%)  | 17 (34%) | 13 (26%)  | 23 (46%)  | 8 (16%)  |
| Clindamycin                           | 16 (5.3%)   | 4 (8%)    | 3 (6%)    | 6 (12%)  | 0 (0%)    | 1 (2%)    | 2 (4%)   |
| Fluoroquinolone                       | 45 (15%)    | 2 (4%)    | 7 (14%)   | 4 (8%)   | 12 (24%)  | 18 (36%)  | 2 (4%)   |

**Table S2. *tcdB* Endpoint PCR of asymptomatic control subjects**

|                                     | <i>C. difficile tcdB</i> PCR positive | <i>C. difficile tcdB</i> PCR negative | Total    |
|-------------------------------------|---------------------------------------|---------------------------------------|----------|
| <i>C. innocuum</i> culture positive | 10                                    | 40                                    | 50 (50%) |
| <i>C. innocuum</i> culture negative | 9                                     | 41                                    | 50 (50%) |
| <b>Total</b>                        | 19 (19%)                              | 81 (81%)                              | 100      |

Association between *C. difficile tcdB* PCR and *C. innocuum* culture positivity: Cramer's V = 0.03 (no association)

**Table S3. Bacterial strains and plasmids used in this study**

| Strain or plasmid |                                                    | Relevant genotype or description                                                                                                                                                                                                           | Source or reference |
|-------------------|----------------------------------------------------|--------------------------------------------------------------------------------------------------------------------------------------------------------------------------------------------------------------------------------------------|---------------------|
| <b>Strains</b>    | <i>E. coli</i>                                     |                                                                                                                                                                                                                                            |                     |
|                   | One Shot <sup>®</sup> TOP10 Competent Cells        | F- <i>mcrA</i> Δ( <i>mrr</i> - <i>hsdRMS</i> - <i>mcrBC</i> ) φ80 <i>lacZ</i> Δ <i>M15</i> Δ <i>lacX74</i> <i>recA1</i> <i>araD139</i> Δ( <i>araleu</i> )7697 <i>galU</i> <i>galK</i> <i>rpsL</i> ( <i>StrR</i> ) <i>endA1</i> <i>nupG</i> | Life Technologies   |
| <b>Plasmids</b>   | pCR <sup>™</sup> II-TOPO <sup>®</sup>              |                                                                                                                                                                                                                                            | Life Technologies   |
|                   | pCR <sup>™</sup> II-TOPO <sup>®</sup> /CI amplicon | pCR <sup>™</sup> II-TOPO/CI-amplicon cloned; <i>amp</i> <sup>R</sup>                                                                                                                                                                       | This study          |

**Table S4. Primers used for *C. difficile* endpoint PCR and *C. innocuum* qPCR**

| Primer Name   | Primer Sequence            |
|---------------|----------------------------|
| tcdB-F5670    | CCAAARTGGAGTGTTACAAACAGGTG |
| tcdB-R6079A   | GCATTTCTCCATTCTCAGCAAAGTA  |
| tcdB-R6079B   | GCATTTCTCCGTTTTTCAGCAAAGTA |
| CI_amplicon F | TTTGAAGCAGACCTCTTCCG       |
| CI_amplicon R | ATACAGCGGTATGCAGATTCC      |



**Table S5: Accession numbers and whole genome sequencing read data for included samples**

| Genome Accession | Biosample Accession | Isolate ID     | Study Tree Label | Trimmed Reads (bp) | Contigs (n) | Genome Assembly size (bp) | Fold coverage |
|------------------|---------------------|----------------|------------------|--------------------|-------------|---------------------------|---------------|
| JAKTIN000000000  | SAMN26133632        | ES-LK3N-079    | Ch-Di-CDN-079    | 145263905          | 70          | 4267269                   | 34.04         |
| JAKTIO000000000  | SAMN26133634        | ES-LK3N-089v   | Ch-Di-CDN-089    | 142159129          | 131         | 4680075                   | 30.37         |
| JAKTIP000000000  | SAMN26133635        | ES-LK3N-099V   | Ch-Di-CDN-099    | 210863915          | 226         | 4926477                   | 42.8          |
| JAKTIQ000000000  | SAMN26133637        | ES-LK3N-118    | Ch-Di-CDN-118    | 105303577          | 204         | 4626388                   | 22.76         |
| JAKTIR000000000  | SAMN26133641        | ES-LK3N-157    | Ch-Di-CDN-157    | 70560628           | 161         | 4617537                   | 15.28         |
| JAKTIS000000000  | SAMN26133643        | ES-LK3N-18vs   | Ch-Di-CDN-018    | 184474992          | 70          | 4432230                   | 41.62         |
| JAKTIT000000000  | SAMN26133644        | ES-LK3P-313v   | Ch-Di-CDC-313    | 107554920          | 39          | 4321392                   | 24.88         |
| JAKTIU000000000  | SAMN26133648        | ES-LK3P-333v   | Ch-Di-CDC-333    | 157230099          | 113         | 4670227                   | 33.66         |
| JAKTIV000000000  | SAMN26133649        | ES-LK3P-335v   | Ch-Di-CDC-335    | 109496484          | 103         | 4621349                   | 23.69         |
| JAKTIW000000000  | SAMN26133650        | ES-LK3P-337v   | Ch-Di-CDC-337    | 145325807          | 86          | 4575492                   | 31.76         |
| JAKTIX000000000  | SAMN26133654        | ES-LK3P-402v   | Ch-Di-CDC-402    | 179207488          | 86          | 4279078                   | 41.87         |
| JAKTIY000000000  | SAMN26133655        | ES-LK3P-413v   | Ch-Di-CDC-413    | 127424075          | 175         | 5042912                   | 25.26         |
| JAKTIZ000000000  | SAMN26133656        | ES-LK3P-415v   | Ch-Di-CDC-415    | 135674149          | 73          | 4123513                   | 32.9          |
| JAKTJA000000000  | SAMN26133657        | ES-LK3P-452v   | Ch-Di-CDC-452    | 210359527          | 73          | 4135343                   | 50.86         |
| JAKTJB000000000  | SAMN26133658        | ES-LK3P-462v   | Ch-Di-CDC-462    | 143118540          | 72          | 4165313                   | 34.35         |
| JAKTJC000000000  | SAMN26133661        | ES-LK3P-474v   | Ch-Di-CDC-474    | 108330895          | 139         | 4710457                   | 22.99         |
| JAKTJD000000000  | SAMN26133662        | ES-LK3P-475v   | Ch-Di-CDC-475    | 141011252          | 135         | 4709847                   | 29.93         |
| JAKTJE000000000  | SAMN26133663        | ES-LK3P-476v   | Ch-Di-CDC-476    | 82982610           | 80          | 4230786                   | 19.61         |
| JAKTJF000000000  | SAMN26133664        | ES-LK3P-477v   | Ch-Di-CDC-477    | 57438175           | 173         | 4544210                   | 12.63         |
| JAKTJG000000000  | SAMN26133665        | ES-LK4-006     | Ch-As-006        | 67218540           | 127         | 4614424                   | 14.56         |
| JAKTJH000000000  | SAMN26133666        | ES-LK4-008     | Ch-As-008        | 63540684           | 220         | 5002814                   | 12.7          |
| JAKTJI000000000  | SAMN26133667        | ES-LK4-009v    | Ch-As-009        | 57791925           | 110         | 4231820                   | 13.65         |
| JAKTJJ000000000  | SAMN26133668        | ES-LK4-013v    | Ch-As-013        | 189760205          | 115         | 4550898                   | 41.69         |
| JAKTJK000000000  | SAMN26133669        | ES-LK4-017     | Ch-As-017        | 70266001           | 93          | 4281236                   | 16.41         |
| JAKTJL000000000  | SAMN26133670        | ES-LK4-023v    | Ch-As-023        | 90147588           | 76          | 4477892                   | 20.13         |
| JAKTJM000000000  | SAMN26133671        | ES-LK4-029v    | Ch-As-029        | 78398554           | 78          | 4476279                   | 17.51         |
| JAKTJN000000000  | SAMN26133675        | ES-LK4-047v    | Ch-As-047        | 115302853          | 196         | 4630186                   | 24.9          |
| JAKTJO000000000  | SAMN26133676        | ES-LK4-049s    | Ch-As-049        | 82220052           | 165         | 5124170                   | 16.04         |
| JAKTJP000000000  | SAMN26133677        | ES-LK4-051s    | Ch-As-051        | 132663210          | 184         | 4542123                   | 29.2          |
| JAKTJQ000000000  | SAMN26133678        | ES-LK4-057v    | Ch-As-057        | 122058116          | 104         | 4750803                   | 25.69         |
| JAKTJR000000000  | SAMN26133680        | ES-LK4-060v    | Ch-As-060        | 101261237          | 102         | 4370918                   | 23.16         |
| JAKTJS000000000  | SAMN26133681        | ES-LK4-063     | Ch-As-063        | 69794702           | 121         | 4782743                   | 14.59         |
| JAKTJT000000000  | SAMN26133685        | ES-NU1-AC-001  | Ad-As-001        | 53658042           | 145         | 4423388                   | 12.13         |
| JAKTJU000000000  | SAMN26133686        | ES-NU1-AC-004v | Ad-As-004        | 186369525          | 106         | 4852829                   | 38.4          |
| JAKTJV000000000  | SAMN26133689        | ES-NU1-AC-012L | Ad-As-012        | 90542211           | 130         | 4814669                   | 18.8          |
| JAKTJW000000000  | SAMN26133690        | ES-NU1-AC-013L | Ad-As-013        | 113177718          | 144         | 4766266                   | 23.74         |
| JAKTJX000000000  | SAMN26133691        | ES-NU1-AC-019v | Ad-As-019        | 93113280           | 120         | 4871818                   | 19.11         |
| JAKTJY000000000  | SAMN26133692        | ES-NU1-AC-020v | Ad-As-020        | 71792794           | 43          | 4433780                   | 16.19         |
| JAKTJZ000000000  | SAMN26133694        | ES-NU1-AC-024s | Ad-As-024        | 55482473           | 270         | 4704092                   | 11.79         |
| JAKTKA000000000  | SAMN26133700        | ES-NU1-AC-037v | Ad-As-037        | 73848451           | 90          | 4226656                   | 17.47         |
| JAKTKB000000000  | SAMN26133701        | ES-NU1-AC-039  | Ad-As-039        | 70432411           | 91          | 4225041                   | 16.67         |
| JAKTKC000000000  | SAMN26133702        | ES-NU1-AC-041v | Ad-As-041        | 85989592           | 126         | 4912908                   | 17.5          |
| JAKTKD000000000  | SAMN26133703        | ES-NU1-AC-043  | Ad-As-043        | 63897825           | 153         | 4683634                   | 13.64         |
| JAKTKE000000000  | SAMN26133704        | ES-NU1-AC-044v | Ad-As-044        | 86388982           | 126         | 4732861                   | 18.25         |

|                 |              |                |               |           |     |         |       |
|-----------------|--------------|----------------|---------------|-----------|-----|---------|-------|
| JAKTKF000000000 | SAMN26133705 | ES-NU1-AC-045v | Ad-As-045     | 155716725 | 166 | 5053631 | 30.81 |
| JAKTKG000000000 | SAMN26133706 | ES-NU1-AC-047v | Ad-As-047     | 80232308  | 52  | 4506785 | 17.8  |
| JAKTKH000000000 | SAMN26133707 | ES-NU1-AC-050v | Ad-As-050     | 102226202 | 107 | 4915124 | 20.79 |
| JAKTKI000000000 | SAMN26133708 | ES-NU1-AC-055v | Ad-As-055     | 123562972 | 73  | 4200827 | 29.41 |
| JAKTKJ000000000 | SAMN26133709 | ES-NU1-AC-058v | Ad-As-058     | 132316410 | 160 | 5092192 | 25.98 |
| JAKTKK000000000 | SAMN26133710 | ES-NU1-AC-060v | Ad-As-060     | 109117691 | 171 | 5053153 | 21.59 |
| JAKTKL000000000 | SAMN26133711 | ES-NU1-AC-063L | Ad-As-063     | 116505255 | 99  | 4288226 | 27.16 |
| JAKTKM000000000 | SAMN26133712 | ES-NU1-AC-069v | Ad-As-069     | 61988719  | 333 | 4982908 | 12.44 |
| JAKTKN000000000 | SAMN26133714 | ES-NU1-N-006v  | Ad-Di-CDN-006 | 136321473 | 76  | 4683957 | 29.1  |
| JAKTKO000000000 | SAMN26133719 | ES-NU1-N-042V  | Ad-Di-CDN-042 | 94250036  | 80  | 4309235 | 21.87 |
| JAKTKP000000000 | SAMN26133722 | ES-NU1-P-011vL | Ad-Di-CDC-011 | 161444008 | 111 | 4458369 | 36.21 |
| JAKTKQ000000000 | SAMN26133723 | ES-NU1-P-021v  | Ad-Di-CDC-021 | 126855973 | 97  | 4340552 | 29.22 |
| JAKTKR000000000 | SAMN26133724 | ES-NU1-P-023v  | Ad-Di-CDC-023 | 108393838 | 158 | 4778707 | 22.68 |
| JAKTKS000000000 | SAMN26133725 | ES-NU1-P-030v  | Ad-Di-CDC-030 | 95263670  | 65  | 4321681 | 22.04 |
| JAKTKT000000000 | SAMN26133734 | ES-NU1-P-075v  | Ad-Di-CDC-075 | 63132375  | 222 | 4742362 | 13.31 |
| JAKTKU000000000 | SAMN26133740 | ES-NU1-P-088s  | Ad-Di-CDC-088 | 147480999 | 128 | 4588916 | 32.13 |
| JAKTKV000000000 | SAMN26133744 | ES-NU1-P-098v  | Ad-Di-CDC-098 | 144603464 | 120 | 4708720 | 30.7  |
| JAKTKW000000000 | SAMN26133745 | ES-NU1-P-099v  | Ad-Di-CDC-099 | 125721298 | 189 | 5116544 | 24.57 |
| JAKTKX000000000 | SAMN26133746 | ES-NU1-P-101v  | Ad-Di-CDC-101 | 96106006  | 79  | 4402081 | 21.83 |
| JAKTKY000000000 | SAMN26133747 | ES-NU1-P-102v  | Ad-Di-CDC-102 | 116502650 | 74  | 4288338 | 27.16 |
| JAKTKZ000000000 | SAMN26133630 | LK3N-002v      | Ch-Di-CDN-002 | 88441821  | 158 | 4820073 | 18.34 |
| JAKTLA000000000 | SAMN26133631 | LK3N-042v      | Ch-Di-CDN-042 | 117934124 | 64  | 4097096 | 28.78 |
| JAKTLB000000000 | SAMN26133633 | LK3N-085v      | Ch-Di-CDN-085 | 90928149  | 140 | 4624173 | 19.66 |
| JAKTLC000000000 | SAMN26133636 | LK3N-102       | Ch-Di-CDN-102 | 57099045  | 102 | 4553048 | 12.54 |
| JAKTLD000000000 | SAMN26133638 | LK3N-119V      | Ch-Di-CDN-119 | 97032151  | 64  | 4096925 | 23.68 |
| JAKTLE000000000 | SAMN26133639 | LK3N-120v      | Ch-Di-CDN-120 | 71724351  | 79  | 4258639 | 16.84 |
| JAKTLF000000000 | SAMN26133640 | LK3N-131v      | Ch-Di-CDN-131 | 115129240 | 119 | 4156210 | 27.7  |
| JAKTLG000000000 | SAMN26133642 | LK3N-164V      | Ch-Di-CDN-164 | 70877291  | 145 | 4560140 | 15.54 |
| JAKTLH000000000 | SAMN26133645 | LK3P-318m      | Ch-Di-CDC-318 | 68733525  | 110 | 4341055 | 15.83 |
| JAKTLI000000000 | SAMN26133646 | LK3P-322v      | Ch-Di-CDC-322 | 89537175  | 214 | 5069761 | 17.66 |
| JAKTLJ000000000 | SAMN26133647 | LK3P-330v      | Ch-Di-CDC-330 | 56089006  | 105 | 4170637 | 13.44 |
| JAKTLK000000000 | SAMN26133651 | LK3P-351       | Ch-Di-CDC-351 | 48448820  | 201 | 4566641 | 10.6  |
| JAKTLL000000000 | SAMN26133652 | LK3P-366v      | Ch-Di-CDC-366 | 64291560  | 133 | 4309597 | 14.91 |
| JAKTLM000000000 | SAMN26133653 | LK3P-369v      | Ch-Di-CDC-369 | 105468573 | 108 | 4396273 | 23.99 |
| JAKTLN000000000 | SAMN26133659 | LK3P-471v      | Ch-Di-CDC-471 | 119881854 | 92  | 4316023 | 27.77 |
| JAKTLO000000000 | SAMN26133660 | LK3P-473v      | Ch-Di-CDC-473 | 89015953  | 107 | 4263841 | 20.87 |
| JAKTLP000000000 | SAMN26133672 | LK4-030v       | Ch-As-030     | 78765864  | 51  | 4492787 | 17.53 |
| JAKTLQ000000000 | SAMN26133673 | LK4-037v       | Ch-As-037     | 140531555 | 193 | 4736494 | 29.66 |
| JAKTLR000000000 | SAMN26133674 | LK4-042v       | Ch-As-042     | 77671977  | 98  | 4396346 | 17.66 |
| JAKTLS000000000 | SAMN26133679 | LK4-059v       | Ch-As-059     | 194702070 | 93  | 4643497 | 41.93 |
| JAKTLT000000000 | SAMN26133682 | LK4-066v       | Ch-As-066     | 158158394 | 90  | 4694802 | 33.68 |
| JAKTLU000000000 | SAMN26133683 | LK4-067v       | Ch-As-067     | 192269432 | 76  | 4452094 | 43.18 |
| JAKTLV000000000 | SAMN26133684 | LK4-084v       | Ch-As-084     | 176031817 | 98  | 4349798 | 40.46 |
| JAKTLW000000000 | SAMN26133687 | NU1-AC-005     | Ad-As-005     | 106378416 | 54  | 4435865 | 23.98 |
| JAKTLX000000000 | SAMN26133688 | NU1-AC-006     | Ad-As-006     | 87628435  | 94  | 4602045 | 19.04 |
| JAKTLY000000000 | SAMN26133693 | NU1-AC-022v    | Ad-As-022     | 181164691 | 101 | 4324477 | 41.89 |
| JAKTLZ000000000 | SAMN26133695 | NU1-AC-027     | Ad-As-027     | 135697688 | 184 | 4864029 | 27.89 |
| JAKTMA000000000 | SAMN26133696 | NU1-AC-029v    | Ad-As-029     | 170387875 | 174 | 4801648 | 35.48 |

|                 |              |             |               |           |     |         |       |
|-----------------|--------------|-------------|---------------|-----------|-----|---------|-------|
| JAKTMB000000000 | SAMN26133697 | NU1-AC-030v | Ad-As-030     | 135206510 | 172 | 5033604 | 26.86 |
| JAKTMC000000000 | SAMN26133698 | NU1-AC-032  | Ad-As-032     | 81379467  | 224 | 5251147 | 15.49 |
| JAKTMD000000000 | SAMN26133699 | NU1-AC-033v | Ad-As-033     | 161898082 | 71  | 4183439 | 38.69 |
| JAKTME000000000 | SAMN26133713 | NU1-N-003   | Ad-Di-CDN-003 | 129218143 | 56  | 4234591 | 30.51 |
| JAKTMF000000000 | SAMN26133715 | NU1-N-014v  | Ad-Di-CDN-014 | 126188389 | 100 | 5007695 | 25.19 |
| JAKTMG000000000 | SAMN26133716 | NU1-N-016v  | Ad-Di-CDN-016 | 122103839 | 152 | 4856793 | 25.14 |
| JAKTMH000000000 | SAMN26133717 | NU1-N-024v  | Ad-Di-CDN-024 | 82713555  | 229 | 5007713 | 16.51 |
| JAKTMI000000000 | SAMN26133718 | NU1-N-037v  | Ad-Di-CDN-037 | 103430746 | 118 | 4531600 | 22.82 |
| JAKTMJ000000000 | SAMN26133720 | NU1-N-083v  | Ad-Di-CDN-083 | 88735714  | 63  | 4238605 | 20.93 |
| JAKTMK000000000 | SAMN26133721 | NU1-N-084   | Ad-Di-CDN-084 | 92422736  | 82  | 4979327 | 18.56 |
| JAKTML000000000 | SAMN26133726 | NU1-P-034vL | Ad-Di-CDC-034 | 96912793  | 135 | 4917002 | 19.7  |
| JAKTMM000000000 | SAMN26133727 | NU1-P-036v  | Ad-Di-CDC-036 | 118153263 | 62  | 4249735 | 27.8  |
| JAKTMN000000000 | SAMN26133728 | NU1-P-048v  | Ad-Di-CDC-048 | 147708343 | 117 | 4688484 | 31.5  |
| JAKTMO000000000 | SAMN26133729 | NU1-P-056vs | Ad-Di-CDC-056 | 116067891 | 102 | 4745483 | 24.45 |
| JAKTMP000000000 | SAMN26133730 | NU1-P-066vs | Ad-Di-CDC-066 | 106375852 | 69  | 4261183 | 24.96 |
| JAKTMQ000000000 | SAMN26133731 | NU1-P-069v  | Ad-Di-CDC-069 | 83126477  | 136 | 4705612 | 17.66 |
| JAKTMR000000000 | SAMN26133732 | NU1-P-072v  | Ad-Di-CDC-072 | 61521386  | 318 | 4944215 | 12.44 |
| JAKTMS000000000 | SAMN26133733 | NU1-P-074v  | Ad-Di-CDC-074 | 148881513 | 98  | 4767524 | 31.22 |
| JAKTMT000000000 | SAMN26133735 | NU1-P-076v  | Ad-Di-CDC-076 | 84574124  | 89  | 4325396 | 19.55 |
| JAKTMU000000000 | SAMN26133736 | NU1-P-078v  | Ad-Di-CDC-078 | 50592092  | 153 | 4163001 | 12.15 |
| JAKTMV000000000 | SAMN26133737 | NU1-P-083v  | Ad-Di-CDC-083 | 97119045  | 152 | 4643782 | 20.91 |
| JAKTMW000000000 | SAMN26133738 | NU1-P-084v  | Ad-Di-CDC-084 | 75709735  | 67  | 4133230 | 18.31 |
| JAKTMX000000000 | SAMN26133739 | NU1-P-086v  | Ad-Di-CDC-086 | 107516359 | 92  | 4414456 | 24.35 |
| JAKTMY000000000 | SAMN26133741 | NU1-P-089s  | Ad-Di-CDC-089 | 84127968  | 80  | 4181681 | 20.11 |
| JAKTMZ000000000 | SAMN26133742 | NU1-P-090v  | Ad-Di-CDC-090 | 123011076 | 73  | 4214980 | 29.18 |
| JAKTNA000000000 | SAMN26133743 | NU1-P-091v  | Ad-Di-CDC-091 | 139462877 | 38  | 4120577 | 33.84 |
| JAKTNB000000000 | SAMN26133748 | NU1-P-103I  | Ad-Di-CDC-103 | 177206824 | 49  | 4340322 | 40.82 |

## SUPPLEMENTAL FIGURES

**Figure S1. *C. innocuum* culture positivity rates and cycle threshold values from adult subjects with AAD and asymptomatic controls.**

(A-B) Percent *C. innocuum* (CI) culture positivity rates for a cohort of subjects with (panel A) diarrhea (Di) or asymptomatic controls (As), and (panel B) subjects with diarrhea who are either *C. difficile* colonized (Di-CDC) or *C. difficile* negative (Di-CDN). (C-D) Box plots of CI cycle threshold (Ct) values as determined by qPCR of (panel C) As and Di subjects, and (panel D) As, Di-CDC, and Di-CDN. Boxes show the median, 25<sup>th</sup> and 75<sup>th</sup> percentiles. The whiskers represent the maximum and minimum data values.

Ns, not significant; \*p-value < 0.05 (or Bonferroni-corrected p value < 0.25 for pairwise comparisons of multiple groups in panels B and D); \*\*p-value < 0.01; \*\*\*p-value < 0.001

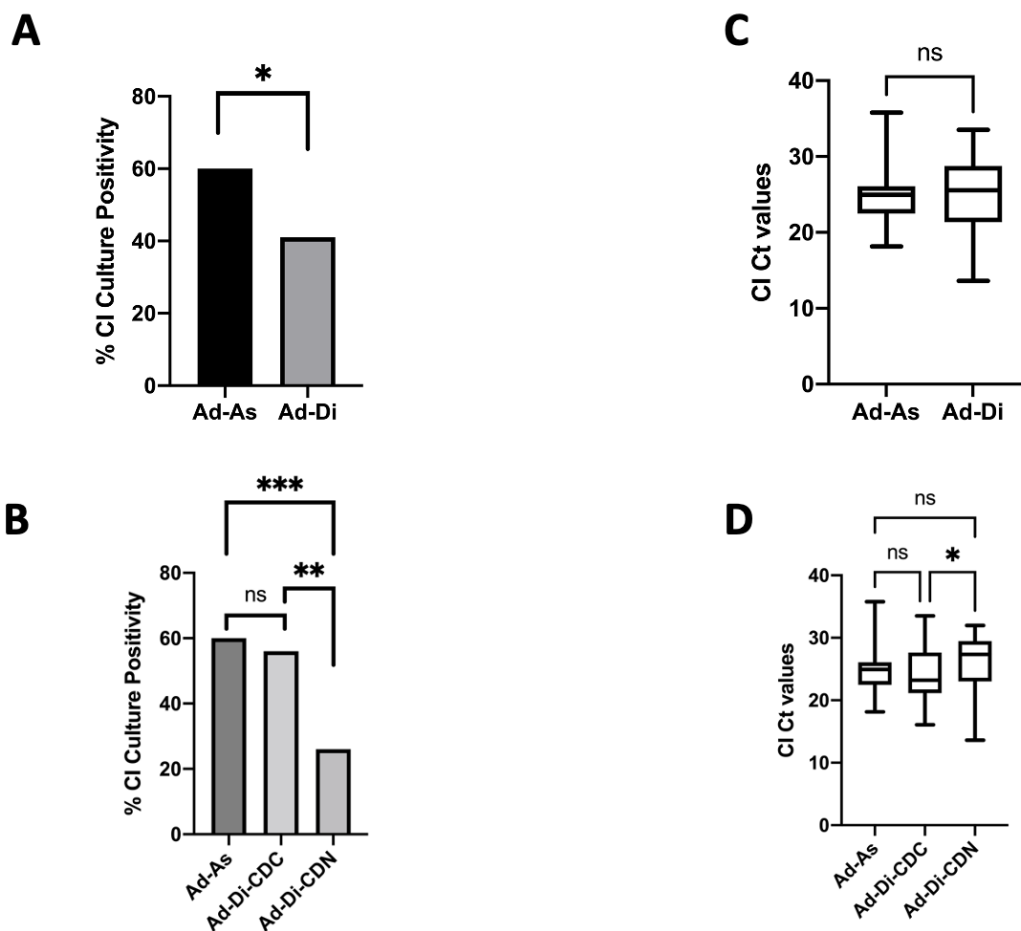

**Figure S2. *C. innocuum* culture positivity rates and cycle threshold values from pediatric subjects with AAD and asymptomatic controls.**

(A-B) Percent *C. innocuum* (CI) culture positivity rates for a cohort of subjects with (panel A) diarrhea (Di) or asymptomatic controls (As), and (panel B) subjects with diarrhea who are either *C. difficile* colonized (Di-CDC) or *C. difficile* negative (Di-CDN). (C-D) Box plots of CI cycle threshold (Ct) values as determined by qPCR of (panel C) As and Di subjects, and (panel D) As, Di-CDC, and Di-CDN. Boxes show the median, 25th and 75th percentiles. The whiskers represent the maximum and minimum data values.

ns, not significant; \*p-value < 0.05 (or Bonferroni-corrected p value <0.25 for pairwise comparisons of multiple groups in panels B and D); \*\*p-value < 0.01; \*\*\*p-value < 0.001

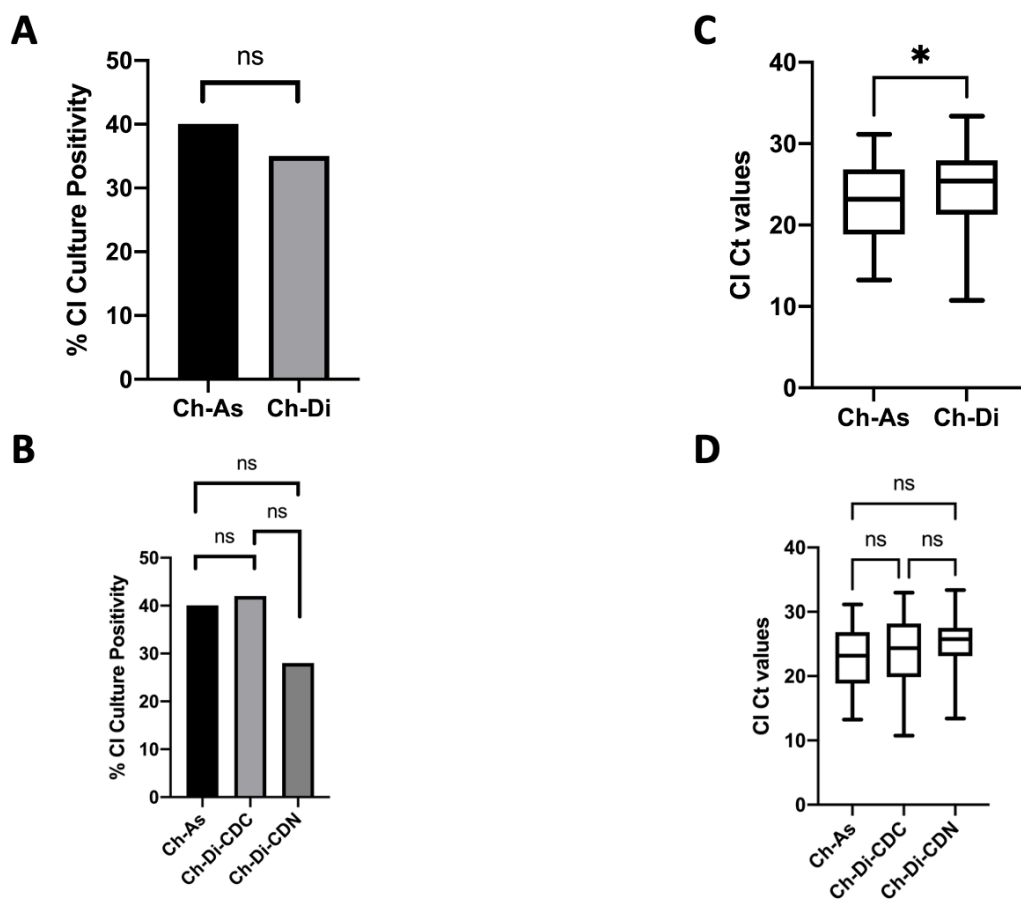

**Figure S3. Cladogram of *C. innocuum* isolates stratified by age group.**

*C. innocuum* isolates from children (n=55) and adults (n=64) are identified by pink and gray bars, respectively. The two reference strains, LC-CI [9] and CI-ATCC [8], are indicated by the black bar.

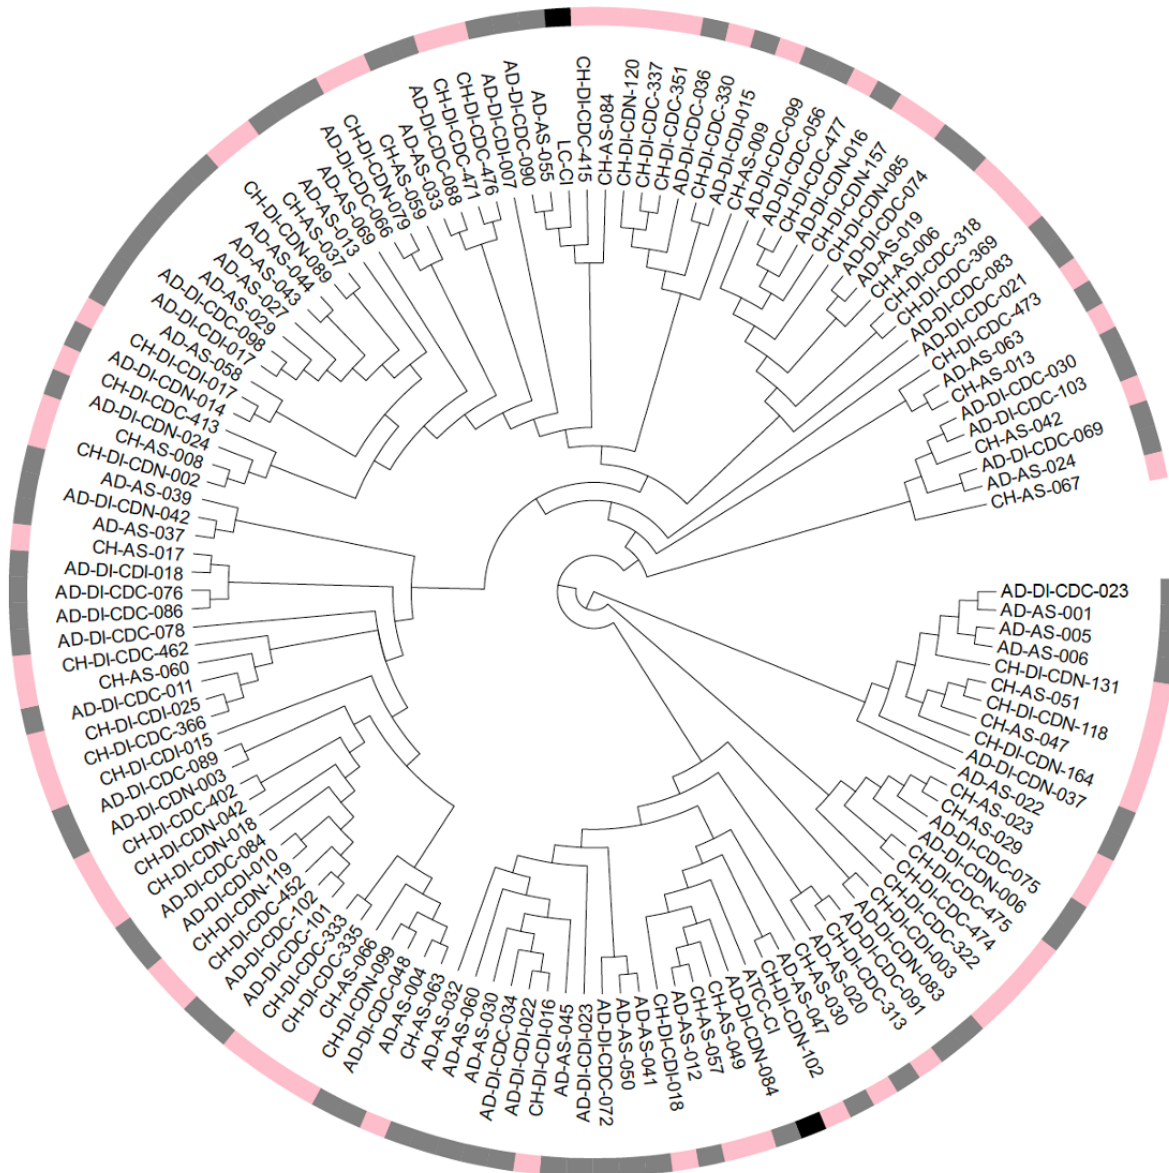

Supplement: ciac483_supplementary_data.pdf [file ciac483_supplementary_data.pdf]
